# Supplementary material
Source: MDPI journal article supplement (https://www.mdpi.com/1999-4907/14/5/911)
Supplement: s1 [file s1]

**Supplementary Table S1. Primers used in this study.**

| Experimental                   |    | Gene         | F (5'-3')                         | R (5'-3')                        |
|--------------------------------|----|--------------|-----------------------------------|----------------------------------|
| <b>Bait vector</b>             | 1  | pGBK-HbGF14a | ACACATATGGAGAAGGAGAGAGAGCAGC      | TGTGGATCCCTAATTCTCAGCTTGAGGTTCAT |
|                                | 2  | pGBK-HbGF14b | ACACATATGTCACCTACCGAATCTTCACG     | TGTGGATCCTCACTGTTGCGGCTGTCCCTCAC |
|                                | 3  | pGBK-HbGF14c | ACACATATGGCGGTTGCACCTTCATCTCG     | TGTGGATCCTCACTGTTGCGGCTGTCCCTCAC |
|                                | 4  | pGBK-HbGF14d | ACACATATGGCTTCTTCCTCTAAGGAT       | TGTGTCGACCTCCGCATCTTCGCCTCCAACT  |
|                                | 5  | pGBK-HbGF14e | ACAGAATTCATGGCTTCCTCCAATGAACGAGA  | TGTGTCGACCTATGCATCGTTGACTCCATT   |
|                                | 6  | pGBK-HbGF14f | ACACCATGGAGATGGCTGAACGCAGCAAGTTCG | TGTCTGCAGCTCTGCATCCTCTGTCCCACCTA |
|                                | 7  | pGBK-HbGF14g | ACACCATGGAGATGGCTGAACGCGACAAGTTCA | TGTGTCGACCTCTGCATCCTCTGCCCCACC   |
|                                | 8  | pGBK-HbGF14h | ACACCATGGAGATGGCCGCCGGATCTCCACGCG | TGTCTGCAGTTGCTTTTGCTCTTCCTCACGC  |
|                                | 9  | pGBK-HbGF14i | ACAGAATTCATGGCGGTTGCACCTTCATCTC   | TGTGTCGACCTGCTGTTTCATCAGTGGGTTTA |
|                                | 10 | pGBK-HbGF14j | ACAGAATTCATGGCGATTGTGATGCCGGAAA   | TGTGTCGACTGCCTCATCTATCTGCTCCTGC  |
| <b>Prey vector</b>             | 1  | pGAD-HbSRPP  | ACACATATGGCTGAAGAGGTGGAGGAA       | TGTGGATCCTGATGCCTCATCTCCAAA      |
| <b>BiFC</b>                    | 1  | pGN1-HbSRPP  | ACAACGCGTGCTGAAGAGGTGGAGGAA       | TGTGGATCCTGATGCCTCATCTCCAAA      |
|                                | 2  | P2GC-HbGF14c | CATACTAGTATGGCGGTTGCACCTTCATCT    | ATAGGATCCCTGCTGATCTTCAGTGGGTTT   |
|                                | 3  | pGN1-HbGF14c | CATACTAGTATGGCGGTTGCACCTTCATCT    | ATAGGATCCCTGCTGATCTTCAGTGGGTTT   |
|                                | 4  | P2GC-HbSRPP  | ACAGTCGACGCTGAAGAGGTGGAGGAA       | TGTGGATCCTGATGCCTCATCTCCAAA      |
| <b>Pull down</b>               | 1  | pET-HbSRPP   | ACAGGATCCATGGCTGAAGAGGTGGAGGAA    | TGTGTCGACTGATGCCTCATCTCCAAACAC   |
|                                | 2  | pGEX-HbGF14c | ACAGGATCCATGGCGGTTGCACCTTCATCTCG  | TGTGTCGACCTGTTGCGGCTGTCCCTCACCCG |
| <b>Site directed mutagenic</b> | 1  | pGAD-S185A   | ACACATATGGCTGAAGAGGTGGAGGAA       | ATAGGATCCAGGCAAATAGGTGGACACTCT   |
